# Supplementary material for: Fecal carriage of ESBL-, carbapenemase- and AmpC- producing Escherichia coli in cattle and sheep in Algeria: Emergence of NDM and OXA-181
Source: Research Square preprint supplement (doi:10.21203/rs.3.rs-5999651/v1), 2025-04-22
Supplement: Supplementary file 1 [file 30dc494a5643ec3ecac097ba.docx]

**Table S1.** Farms information and samples collection

| Farm | Location | Nature of region | Farming system | Date of sampling | Animal species | Age | Number of animals | Number of samples |
| --- | --- | --- | --- | --- | --- | --- | --- | --- |
| F1 | Heliopolis | Urban | Intensive | September 2021 | Cattle | 02-05 months | 15 | 08 |
| F2 | Heliopolis | Urban | Intensive | September 2021 | Cattle | 01-04 years | 09 | 09 |
| F3 | Heliopolis | Urban | Intensive | September 2021 | Cattle | 03-05 years | 11 | 11 |
| F4 | Heliopolis | Urban | Intensive | December 2021 | Cattle | 01-07 years | 20 | 18 |
| F5 | Heliopolis | Urban | Intensive | December 2021 | Cattle | 04-10 years | 06 | 06 |
| F6 | Heliopolis | Urban | Intensive | December 2021 | Cattle | 01-04 years | 05 | 05 |
| F7 | Heliopolis | Urban | Semi-extensive | December 2021 | Cattle | 01-05 years | 10 | 10 |
| F8 | Bouati Mahmoud | Rural | Semi-extensive | February 2022 | Sheep | 05 months - 03 years | 51 | 30 |
| F9 | Bouati Mahmoud | Rural | Semi-extensive | February 2022 | Cattle | 03-05 years | 05 | 05 |
| F10 | Bouati Mahmoud | Rural | Semi-extensive | February 2022 | Sheep | 08 months -02 years | 44 | 30 |
| F11 | Bouati Mahmoud | Rural | Semi-extensive | February 2022 | Sheep | 04 months - 03 years | 88 | 10 |
| F12 | Bouati Mahmoud | Rural | Semi-extensive | February 2022 | Cattle | 01-04 years | 06 | 03 |
| F13 | Bouati Mahmoud | Rural | Semi-extensive | February 2022 | Sheep | 06 months - 05 years | 35 | 20 |
| F14 | Bouati Mahmoud | Rural | Semi-extensive | February 2022 | Cattle | 04-06 years | 04 | 04 |
| F15 | Bouati Mahmoud | Rural | Semi-extensive | February 2022 | Cattle | 03-07 years | 04 | 04 |
| F16 | Bouati Mahmoud | Rural | Semi-extensive | February 2022 | Sheep | 09 months - 04 years | 20 | 10 |
| F17 | Bouati Mahmoud | Rural | Semi-extensive | February 2022 | Cattle | 02-08 years | 05 | 05 |
| F18 | Bouati Mahmoud | Rural | Semi-extensive | February 2022 | Sheep | 03 months -02 years | 33 | 10 |
| F19 | Medjez Ammar | Urban | Semi-extensive | March 2022 | Sheep | 06 months -04 years | 60 | 30 |
| F20 | Hammam Debagh | Rural | Semi-extensive | March 2022 | Cattle | 02-06 years | 07 | 03 |
| F21 | Hammam Debagh | Rural | Semi-extensive | March 2022 | Cattle | 01-04 years | 20 | 10 |
| F22 | Hammam Debagh | Rural | Semi-extensive | March 2022 | Cattle | 03-06 years | 08 | 04 |
| F23 | Bouati Mahmoud | Rural | Semi-extensive | May 2022 | Cattle | 03-05 years | 13 | 10 |
| F24 | Bouati Mahmoud | Rural | Semi-extensive | May 2022 | Cattle | 02-03 years | 07 | 05 |
| F25 | Bouati Mahmoud | Rural | Semi-extensive | May 2022 | Cattle | 01-04 years | 06 | 05 |
| F26 | Bouati Mahmoud | Rural | Semi-extensive | May 2022 | Cattle | 06-10 years | 08 | 06 |
| F27 | Bouati Mahmoud | Rural | Semi-extensive | May 2022 | Cattle | 05-07 years | 06 | 04 |
| F28 | Bouati Mahmoud | Rural | Semi-extensive | May 2022 | Cattle | 06-08 years | 12 | 10 |


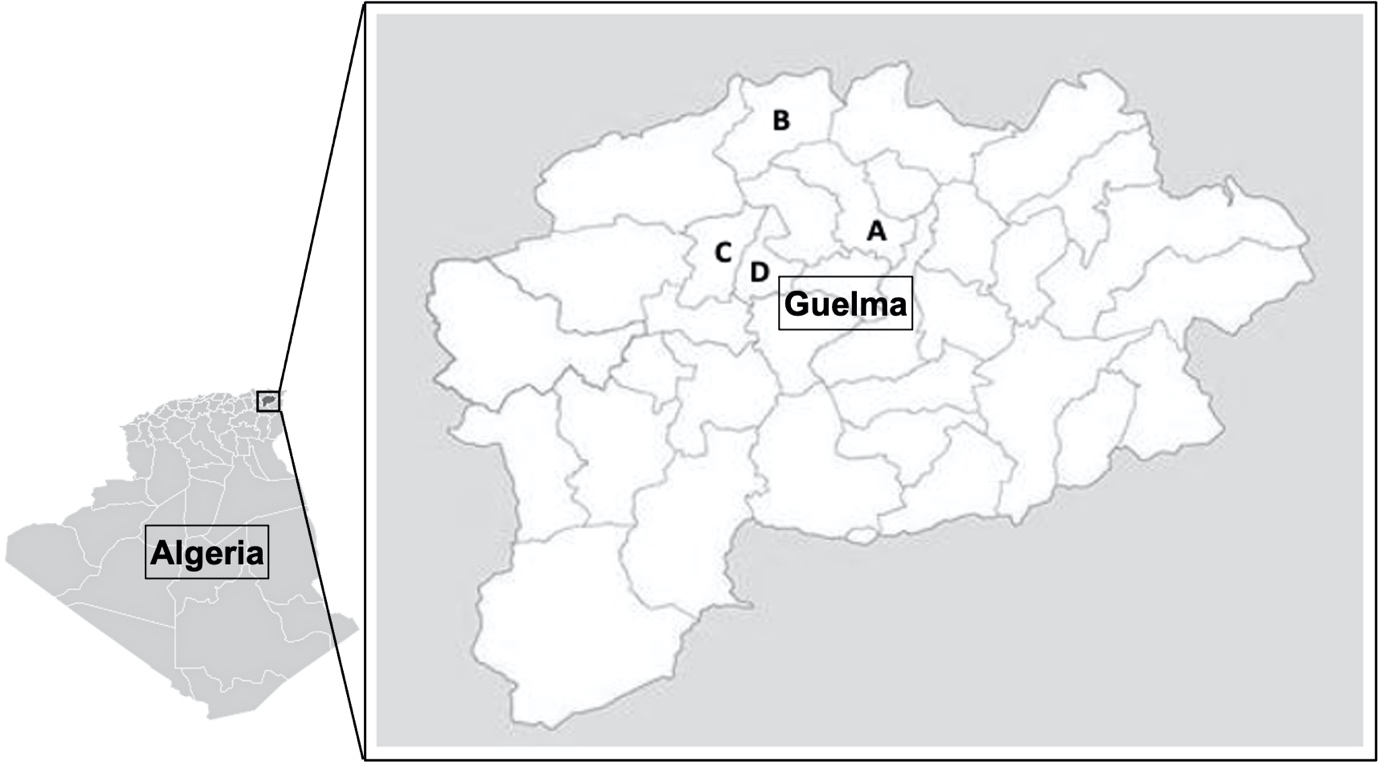


**Figure S1.** Sampling **area** (**A:** Heliopolis; **B:** Bouati Mahmoud; **C:** Hammam Debagh; **B:** Medjez Amma
